# Supplementary material for: A novel high-throughput method for kinetic characterisation of anaerobic bioproduction strains, applied to Clostridium kluyveri
Source: PubMed Central journal article supplement (PMC6021416; doi:10.1038/s41598-018-27594-9), 2018-06-27
Supplement: 41598_2018_27594_MOESM1_ESM.pdf [file 41598_2018_27594_MOESM1_ESM.pdf]

2

3 Supplementary information to: A novel high-throughput method for kinetic characterisation of  
4 anaerobic bioproduction strains, applied to *Clostridium kluyveri*

5

6 **Pieter Candry<sup>1</sup>, Timothy Van Daele<sup>2</sup>, Kyrina Denis<sup>1,2</sup>, Youri Amerlinck<sup>2</sup>, Stephen J.**

7 **Andersen<sup>1</sup>, Ramon Ganigué<sup>1</sup>, Jan B.A. Arends<sup>1</sup>, Ingmar Nopens<sup>2</sup>, Korneel Rabaey<sup>1</sup>**

8

9 <sup>1</sup> Center for Microbial Ecology and Technology (CMET),

10 <sup>2</sup> BIOMATH, Department of Mathematical Modelling, Statistics and Bioinformatics,

11 Faculty of Bioscience Engineering Ghent University, Coupure Links 653, 9000 Gent, Belgium

12

13

14

15

16

17

18 \* Correspondence to: Korneel Rabaey, Ghent University; Faculty of Bioscience Engineering;

19 Centre for Microbial Ecology and Technology (CMET); Coupure Links 653; B-9000 Gent,

20 Belgium; phone: +32 (0)9 264 59 76; fax: +32 (0)9 264 62 48; E-mail:

21 [Korneel.Rabaey@UGent.be](mailto:Korneel.Rabaey@UGent.be); Webpage: [www.cmet.UGent.be](http://www.cmet.UGent.be).

22

## 23 **S.1. Materials & Methods**

### 24 **S.1.1. Culture & Media**

25 Routine cultivation medium was prepared in accordance to DSM52, with following recipe (in  
26 1L basal medium): 0.31 g  $K_2HPO_4$ , 0.23 g  $KH_2PO_4$ , 0.25 g  $NH_4Cl$ , 0.20 g  $MgSO_4 \cdot 7H_2O$ , 1.00  
27 g yeast extract, 10.00 g K-acetate and 20 mL  $EtOH \cdot L^{-1}$ . Medium was boiled and subsequently  
28 cooled under  $N_2$ -atmosphere, followed by distribution over 10 mL balch tubes or 40 mL serum  
29 flasks. The headspace of the balch tubes or serum flasks was then replaced with  $N_2$  using a gas  
30 headspace exchange apparatus. After autoclaving vitamins and trace elements were added (0.33  
31 mL per 10 mL of medium), made by adding 1 mL of trace element solution SL-10, 1 mL of  
32 selenite-tungstate solution and 0.1 mL of 7-vitamin solution to 30 mL of 84 g/L  $NaHCO_3$  and  
33 filter-sterilizing the solution under  $N_2$ -atmosphere. The SL-10 trace element solution consisted  
34 of (in 1L stock solution): 10 mL 7.7M HCl, 1.5 g  $FeCl_2 \cdot 4H_2O$ , 0.07 g  $ZnCl_2$ , 0.15 g  
35  $MnCl_2 \cdot 4H_2O$ , 0.006 g  $H_3BO_3$ , 0.19 g  $CoCl_2 \cdot 6H_2O$ , 0.002 g  $CuCl_2 \cdot 2H_2O$ , 0.024 g  $NiCl_2 \cdot 6H_2O$   
36 and 0.036 g  $Na_2MoO_4 \cdot 4H_2O$ . The selenite-tungstate solution contained (in 1L stock solution):  
37 0.5 g NaOH, 0.003g  $Na_2SeO_3 \cdot 5H_2O$  and 0.004 g  $Na_2WO_4 \cdot 2H_2O$ . The 7-vitamin solution  
38 consisted of (in 100 mL stock solution): 0.1 g vitamin  $B_{12}$ , 0.08 g p-aminobenzoic acid, 0.02 g  
39 D(+)-Biotin, 0.2 g nicotinic acid, 0.1 g Ca-pantothenate, 0.3 g pyridoxine hydrochloride, 0.2 g  
40 thiamine-HCl.2H<sub>2</sub>O. Before inoculation a solution with reducing agents was containing 5 g.L<sup>-1</sup>  
41 <sup>1</sup> of L-cysteine-HCl.H<sub>2</sub>O and 5 g.L<sup>-1</sup> of  $Na_2S \cdot 9H_2O$ , dissolved in basal medium, using anaerobic  
42 aseptic techniques.

43

44 **S.1.2. Production kinetics**

45 A randomized sampling scheme (Figure S.1) was constructed using R<sup>1</sup>. One scheme (Figure  
 46 S.1) was made for 3 rows and 10 columns, and applied to both conditions in the 96-WP. This  
 47 experiment was performed in triplicate, i.e. 3 96-WP, of which one was in the platereader for  
 48 continuous readings (620 nm) every 15 min. Actual time into the experiment for each timepoint  
 49 is given in Table S.I.

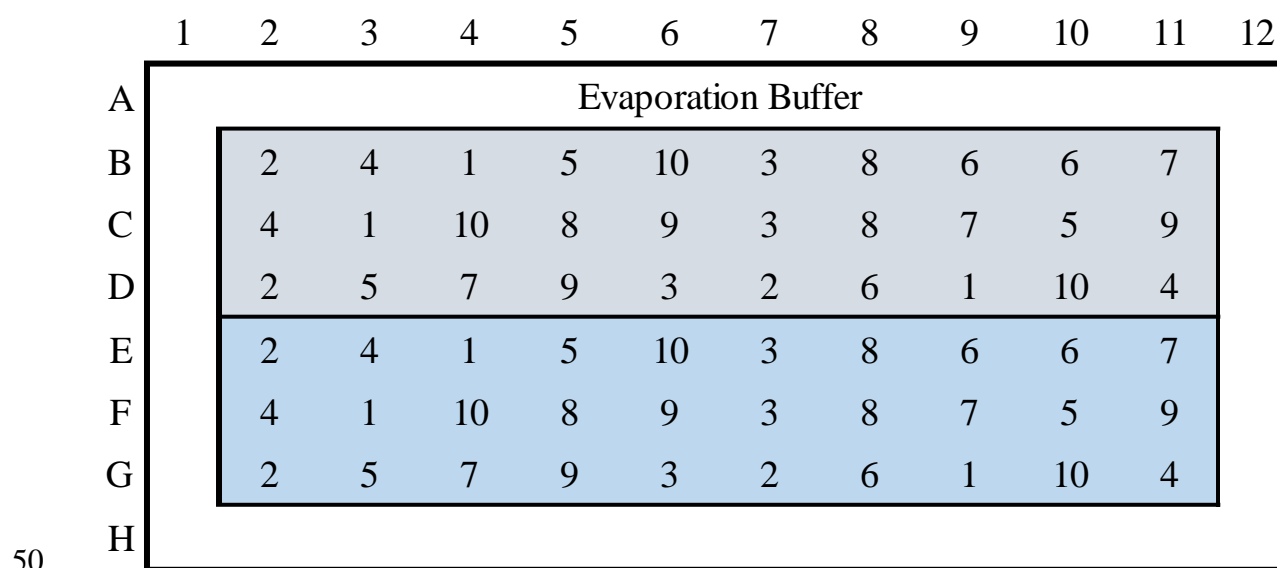

51 **Figure S.1. Randomized sampling scheme for monitoring of production kinetics in 96-**  
 52 **WP. Colours indicate different initial conditions; in the gray area, initial substrate**  
 53 **concentrations were 343 mM EtOH and 81 mM AA, for blue area this was 343 mM EtOH**  
 54 **and 34 mM AA. The number in each well indicates at which timepoint that well was**  
 55 **sampled.**

56 **Table S.I. Time into the experiment per timepoint at which wells were sampled according**  
 57 **to scheme in Figure S.1**

| Timepoint | Time (h) |
|-----------|----------|
| 0         | 0.0      |
| 1         | 9.2      |
| 2         | 13.4     |
| 3         | 22.4     |
| 4         | 31.1     |
| 5         | 36.7     |
| 6         | 41.2     |
| 7         | 45.6     |
| 8         | 60.7     |
| 9         | 68.0     |
| 10        | 91.3     |

### 58 **S.1.3. Abiotic EtOH-evaporation experiments**

59 Because of the volatility of EtOH, an abiotic experiment was set up to establish whether EtOH  
60 can transfer from wells with high concentrations to those with lower concentrations within a  
61 single 96-WP. One 96-WP was divided into several sections (Figure S.2), with rows containing  
62 DSM52 medium with or without EtOH to test whether transfer was taking place through the  
63 headspace. Three sections can be distinguished within this 96-WP. A first section (columns 10-  
64 11) allowed to investigate whether EtOH could transport from one well to another. Columns 2-  
65 6 could show transfer of EtOH further than one row, implying transport through the headspace.  
66 Lastly, column 8 acted as a negative control, i.e. it was expected no EtOH could migrate through  
67 the physical separation by petroleum jelly.

68 To test whether a plastic seal film (Nunc<sup>®</sup> Multiwell Plate polyolefin sealing tape, Sigma-  
69 Aldrich) could relieve EtOH evaporation issues through the headspace, an additional  
70 experiment was performed (Figure S.3). In this experiment, also the wells in the rim of the 96-  
71 WP were used to test whether this could enhance the high-throughput nature of the method even  
72 further. The rationale behind the experiment was much the same: columns 2-4 and 10-11 were  
73 added to see whether EtOH could migrate between adjacent wells, while columns 6 and 8 were  
74 added to test EtOH migration over longer distances. Wells within one condition were pooled at  
75 the end of the experiment and EtOH concentration was determined of the pooled sample. No  
76 experiment with petroleum jelly border was added, because the seal was used as a physical  
77 barrier between wells in the experiment.

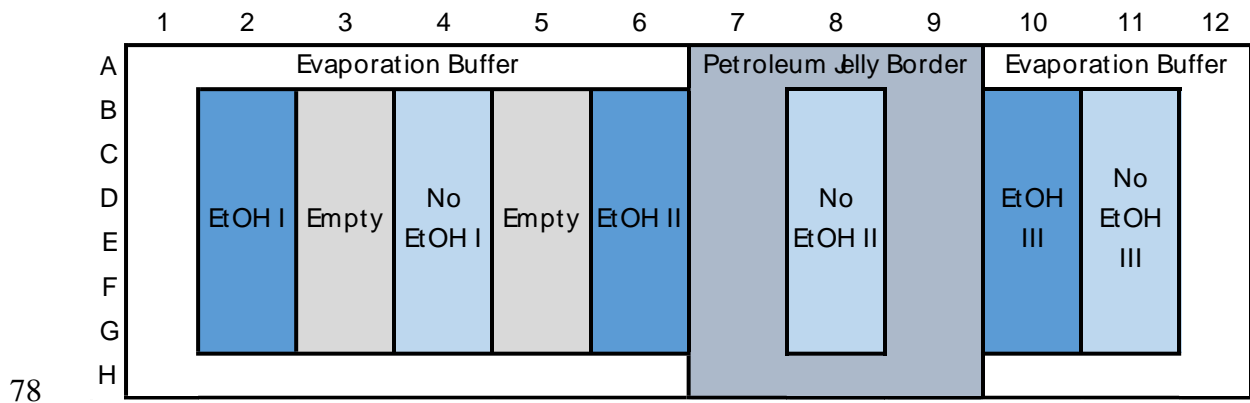

79 **Figure S.2. Schematic representation of 96-well plate for abiotic EtOH-evaporation experiment.**

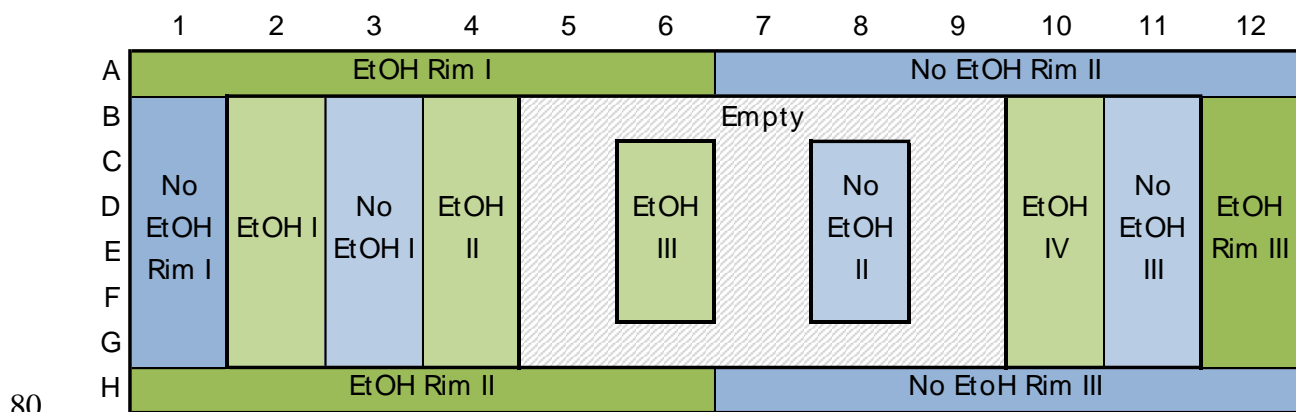

81 **Figure S.3. Schematic representation of 96-well plate for abiotic EtOH-evaporation**  
 82 **experiment using plastic film seal**

83

#### 84 **S.1.4. Linking OD to biomass concentrations**

85 Quantifying biomass based on OD can give valuable information, considering the large amount  
 86 of OD data available in the high-throughput growth curve experiments. To link these  
 87 parameters, a culture grown on standard DSM52 medium in 200 mL batches was taken after 2  
 88 and 4 days. These cultures were centrifuged for 8 min at 8610g, supernatans was removed and  
 89 filtered over 0.20  $\mu$ m filters to obtain cell-free spent medium. This spent medium was first used  
 90 to resuspend the centrifuged biomass in 1/5<sup>th</sup> of the original volume and subsequently make a  
 91 six-fold serial dilution (1:1 cell suspension:spent medium). For each dilution, total cell count,  
 92 VSS and OD were determined. Total cell counts were determined by flow cytometry<sup>2</sup>. This  
 93 experiment was performed in triplicate, i.e. a dilution series was made from 3 independently

94 grown cultures on day 2 and day 4.

### 95 **S.1.5. Analytical methods**

96 C2 to C8 carboxylic acids (including isoforms C4 to C6) were determined by gas  
97 chromatography (GC; GC-2014, Shimadzu®, The Netherlands), with a DB-FFAP 123-3232  
98 column (30 m × 0.32 mm × 0.25 μm; Agilent, Belgium) and a flame ionisation detector (FID).  
99 Liquid samples were conditioned with 2 mL sulfuric acid, 200 mg sodium chloride, and 2-  
100 methyl hexanoic acid as an internal standard for quantification before further extraction with  
101 diethyl ether (1:1 volume sample:ether). The sample (1 μL) was injected at 250°C with a split  
102 ratio of 50 and a purge flow of 3 mL min<sup>-1</sup>. The oven temperature increased by 10°C min<sup>-1</sup>  
103 from 110 to 250°C where it was maintained for 5 min. The FID had a temperature of 300°C.  
104 Nitrogen carrier gas was maintained at a flow rate of 2.49 mL min<sup>-1</sup>. The GC was externally  
105 calibrated with a minimum detection limit of 60 mg/L for AA, and 10 mg/L for all higher  
106 carboxylic acids.

107 Alcohols (acetone, methanol, ethanol, 1-propanol, 2-propanol, 1-butanol, 1-pentanol  
108 and 1-hexanol) were measured by GC (GC-2010-Plus, Shimadzu®, Belgium) with a Stabilwax-  
109 DE-S column (30m x 0.32mm x 1.0 μm, Shimadzu®, Belgium) and an FID. 1 μL of sample  
110 was injected at 230°C with a split ratio of 50 and purge flow of 3.0 mL min<sup>-1</sup>. Oven temperature  
111 was put at 35°C for one minute, after which it increased from 35°C to 230°C at a rate of 10°C  
112 min<sup>-1</sup> where it was kept for 2 minutes. FID temperature was set at 250°C, carrier gas was  
113 nitrogen gas at a flow rate of 1.09 mL min<sup>-1</sup>. The GC was externally calibrated with a minimum  
114 detection limit of 25 mg/L.

115

116 **S.1.6. Model development for chemostat simulations**

117 Ordinary differential equations (ODE) described in main text (Section 3.2.) were modified for  
118 simulation of chemostat conditions. The modified equations for substrate consumption or  
119 product formation (eq. (S1)) and biomass production (eq. (S2)) are given below.

$$\frac{dS}{dt} = \left( \frac{a_S * w_1 * \mu_1}{6 * Y_{EtOH}} + \frac{b_S * w_2 * \mu_2}{6 * Y_{EtOH}} \right) * X + D * (S_{in} - S) \quad (S1)$$

$$\frac{dX}{dt} = (w_1 * \mu_1 + w_2 * \mu_2 - D) * X \quad (S2)$$

120

121 For simulation of chemostat experiments<sup>3</sup>, the reported conditions were applied to the model  
122 (see Table S.II). The concentrations of substrates (EtOH, AA) and products (BA, HA) reached  
123 after simulation for 500h of chemostat operation were then compared to the reported average  
124 concentration for each condition and plotted in Figure 4 of the main text.

125

126 **Table S.II. Conditions applied to modified dynamic mass-balance model for simulation of**  
 127 **chemostat conditions<sup>3</sup>**

| Condition nr. | EtOH<br>(mM) | influent<br>AA influent (mM) | D (h <sup>-1</sup> ) |
|---------------|--------------|------------------------------|----------------------|
| 1             | 42.2±1.9     | 24.6±0.9                     | 0.050±0.001          |
| 2             | 45.4±1.2     | 25.9±0.1                     | 0.100±0.005          |
| 3             | 43.3±1.6     | 25.5±1.0                     | 0.199±0.004          |
| 4             | 44.7±1.1     | 26.2±0.8                     | 0.287±0.008          |
| 5             | 91.3±4.2     | 10.4±0.7                     | 0.038±0.012          |
| 6             | 106.5±5.2    | 9.7±1.1                      | 0.144±0.002          |
| 7             | 100.2±4.7    | 9.5±0.5                      | 0.201±0.003          |
| 8             | 95.0±1.8     | 10.9±1.8                     | 0.282±0.005          |

128

129 **S.1.7. Thermodynamic calculations for assessment of influence of H<sub>2</sub> accumulation**

130 H<sub>2</sub> accumulating in the headspace can limit the metabolism of *C. kluyveri* by reducing the Gibbs  
 131 free energy ( $\Delta G^1$ ), i.e. the amount of energy liberated during the reaction. To evaluate the  
 132 importance of this limitation, thermodynamical calculations were performed, using data and  
 133 methods from literature<sup>4</sup>. Two situations were assessed: (1)  $\Delta G^1$  if only the first reaction step  
 134 is considered, and (2)  $\Delta G^0$  if only HA is an end product, i.e. the sum of both reaction steps (see  
 135 Table S.II.). For both situations, initial conditions were used cf. the DSM 52 medium, and  $\Delta G^1$   
 136 was calculated as the reaction progressed according to the stoichiometry of the reaction. The  
 137 limiting substrate was used to assess the reaction progression, where the first reaction was  
 138 limited by AA, and the second by EtOH availability.



139 To assess the impact of H<sub>2</sub>, this calculation was performed with and without accumulation of  
 140 H<sub>2</sub> in the headspace. To calculate accumulation of H<sub>2</sub>, a Balch tube with a total volume of 26  
 141 mL was considered, with 11.83 mL of liquid medium. Furthermore it was assumed that: (i) no  
 142 substrate was used for biomass production, (ii) no H<sub>2</sub> was lost, through diffusion or in the  
 143 metabolism, (iii) all H<sub>2</sub> produced immediately dissolved from the liquid into the headspace, (iv)  
 144 pH does not change during the reaction, and, (v) initially a very low H<sub>2</sub> partial pressure of  
 145 0.0001 atm (10.1 Pa) was present in the headspace. For the case without H<sub>2</sub> accumulation, H<sub>2</sub>  
 146 partial pressure was assumed to stay constant at this same 0.0001 atm.

147

148 **Table S.III. Reactions considered in thermodynamical calculations.  $\Delta G^{01}_T$  is Gibbs free**  
 149 **energy change at biological standard state (pH 7 at 37°C), calculated using  $\Delta G^0_f$  and  $\Delta H^0_f$**   
 150 **data and methods from literature<sup>4</sup>.**

| Reaction stoichiometry                                                                                                    | ATP<br>produced <sup>5</sup> | $\Delta G^{01}_T$<br>(kJ/mol) | Max $\Delta G^1$<br>(kJ/mol) |
|---------------------------------------------------------------------------------------------------------------------------|------------------------------|-------------------------------|------------------------------|
| 6 EtOH + 4 acetate <sup>-</sup> → 5 butyrate <sup>-</sup> + H <sup>+</sup> + 2 H <sub>2</sub> +<br>4 H <sub>2</sub> O     | 2.5 <sup>#</sup>             | -183.82                       | -180 <sup>~</sup>            |
| 12 EtOH + 3 acetate <sup>-</sup> → 5 hexanoate <sup>-</sup> + 2 H <sup>+</sup> + 4<br>H <sub>2</sub> + 8 H <sub>2</sub> O | 5                            | -404.861                      | -360                         |

151 **# Number of ATP produced according to stoichiometric model of Angenent et al.<sup>5</sup>**

152 **~ Max  $\Delta G^1$  calculated, assuming 72 kJ/mol ATP<sup>5</sup>**

153

154 **S.2. Results**

155 **S.2.1. Abiotic EtOH evaporation experiments**

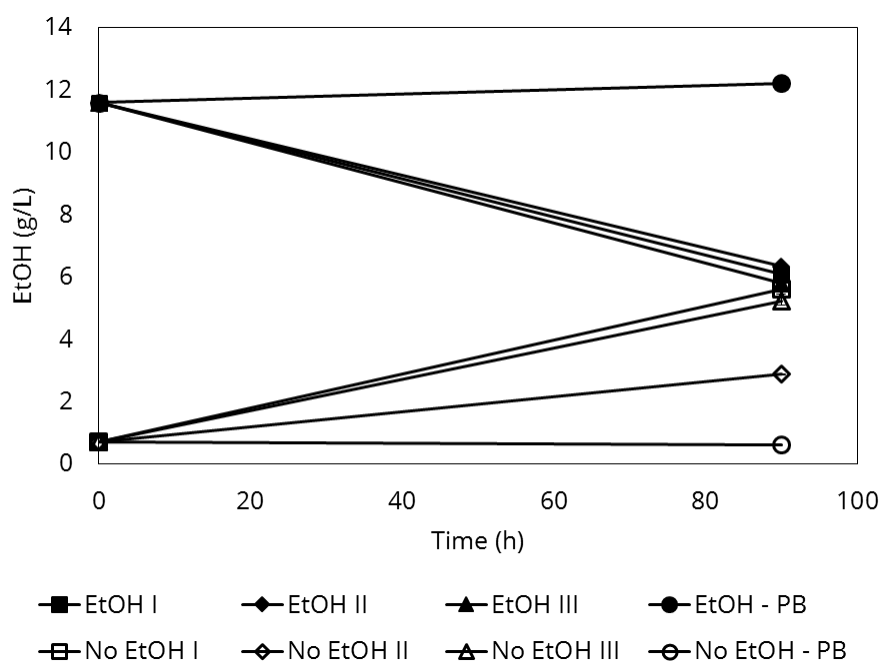

156

157 **Figure S.4. Evolution of EtOH-concentration in abiotic 96-WP experiment.**

158 An abiotic experiment following EtOH-concentrations within a 96-well plate confirms that  
159 EtOH can be transferred through the headspace, according to concentration gradients. It appears  
160 an equilibrium was established across all wells, and even in part through a physical barrier  
161 (petroleum jelly). Diffusion to the environment might occur too, but 91.9% of all EtOH initially  
162 present was recovered at the end of the experiment, not taking into account potential transfer to  
163 the wells acting as evaporation buffer. Evaporation appears not to be troublesome for organic  
164 acids, since (1) they usually behaved similarly in 96-WP and balch tubes, (2) no apparent  
165 stoichiometric inconsistencies were observed as was the case with EtOH, and (3) initial pH was  
166  $7.85 \pm 0.14$ , implying all organic acids to be present in their anionic, non-volatile form.

167

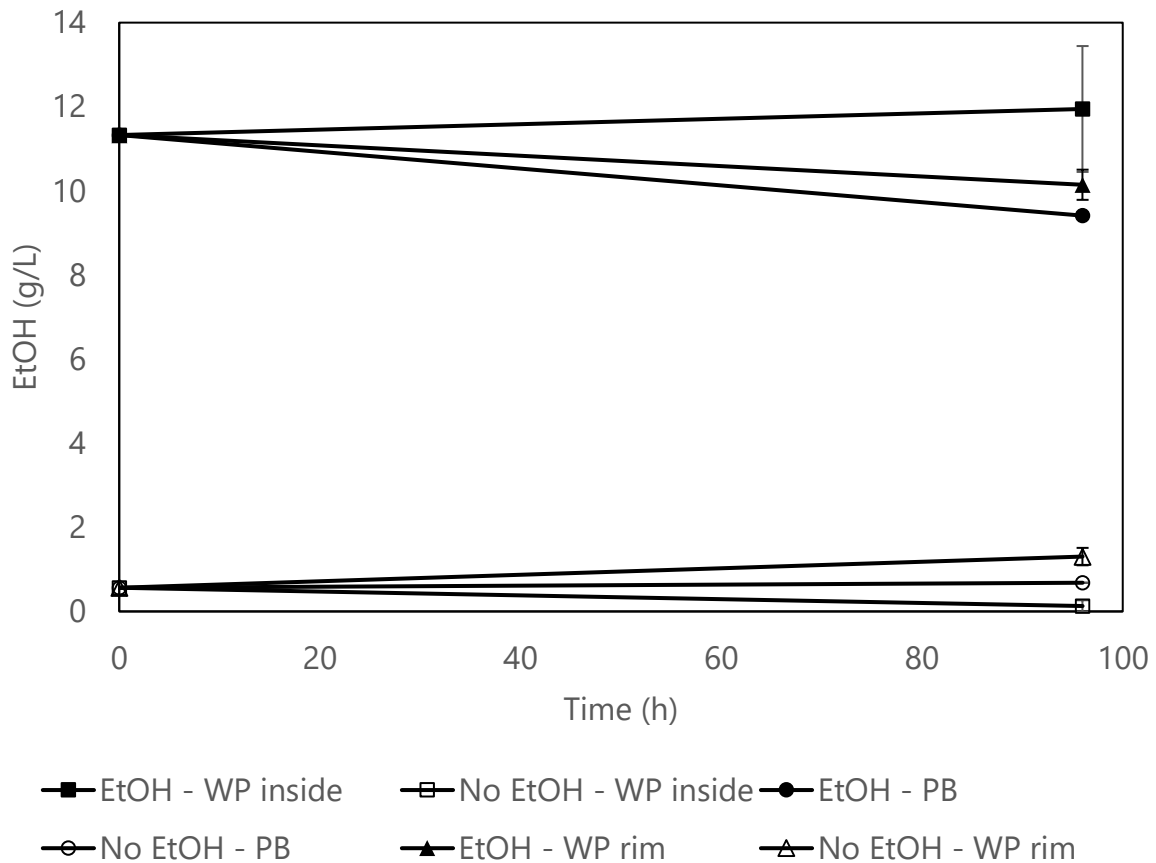

168

169 **Figure 5. Evolution of EtOH-concentrations in abiotic 96-WP experiment using plastic**  
 170 **film seals to prevent EtOH evaporation. Data represented is the average EtOH-**  
 171 **concentration of the replicates (n=3), error bars indicate standard deviation.**

172 When a plastic film seal was used to physically separate each well, EtOH no longer migrated  
 173 between wells in an abiotic experiment. Furthermore, the seal also allowed the outer rims to be  
 174 used without evaporation issues. The seal used in this experiment was not sterilized, yet no  
 175 contamination of the medium was observed, likely due to the very restrictive medium  
 176 composition. When richer media are used, or axenity is strictly necessary, sterile films could  
 177 also be used, but were not tested here.

178

179

180

181 **S.2.2. Lag time ( $\lambda$ ) as a function of EtOH-concentration**

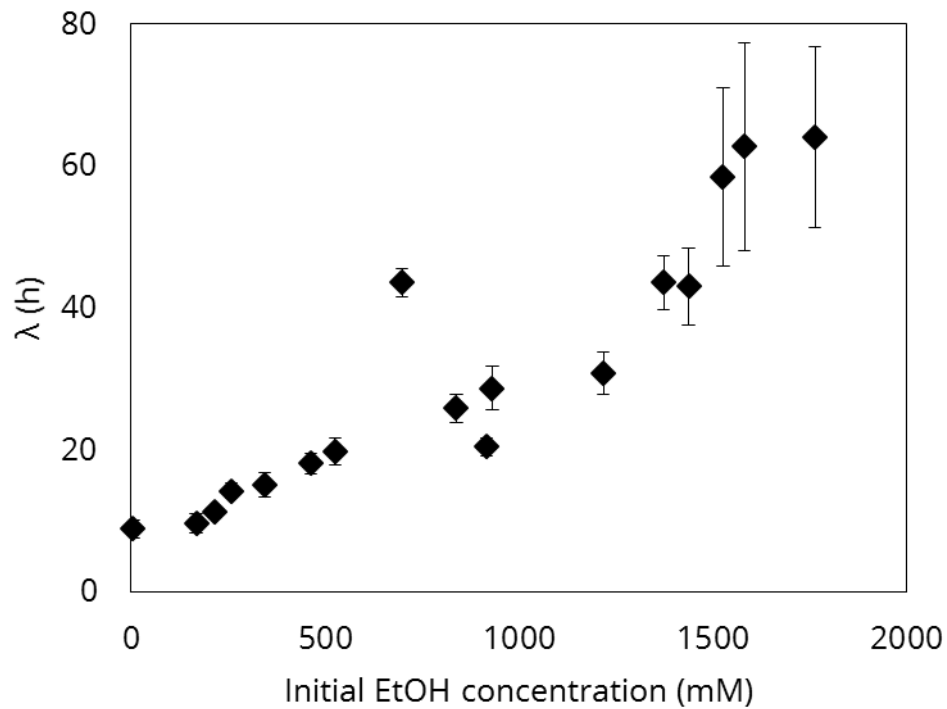

182

183 **Figure S.6. Lag time ( $\lambda$ ) as a function of the initial EtOH-concentration. Error bars**  
184 **represent standard deviation over replicates (n=3).**

185 In Experiment C – varying the initial EtOH-concentration across the wells - a strong correlation  
186 (Pearson coefficient of 0.923) can be observed between  $\lambda$  and the initial EtOH-concentration in  
187 the broth (Figure S.6). A potential source of this correlation is the evaporation of EtOH from  
188 wells with high concentration and diffusion through the headspace to those wells with low  
189 EtOH-concentrations. When concentration drops low enough, growth starts, resulting in  
190 increasing  $\lambda$  with increasing concentrations. This hypothesis is corroborated by the results in  
191 S.3.1. showing EtOH can be transferred between wells.

192

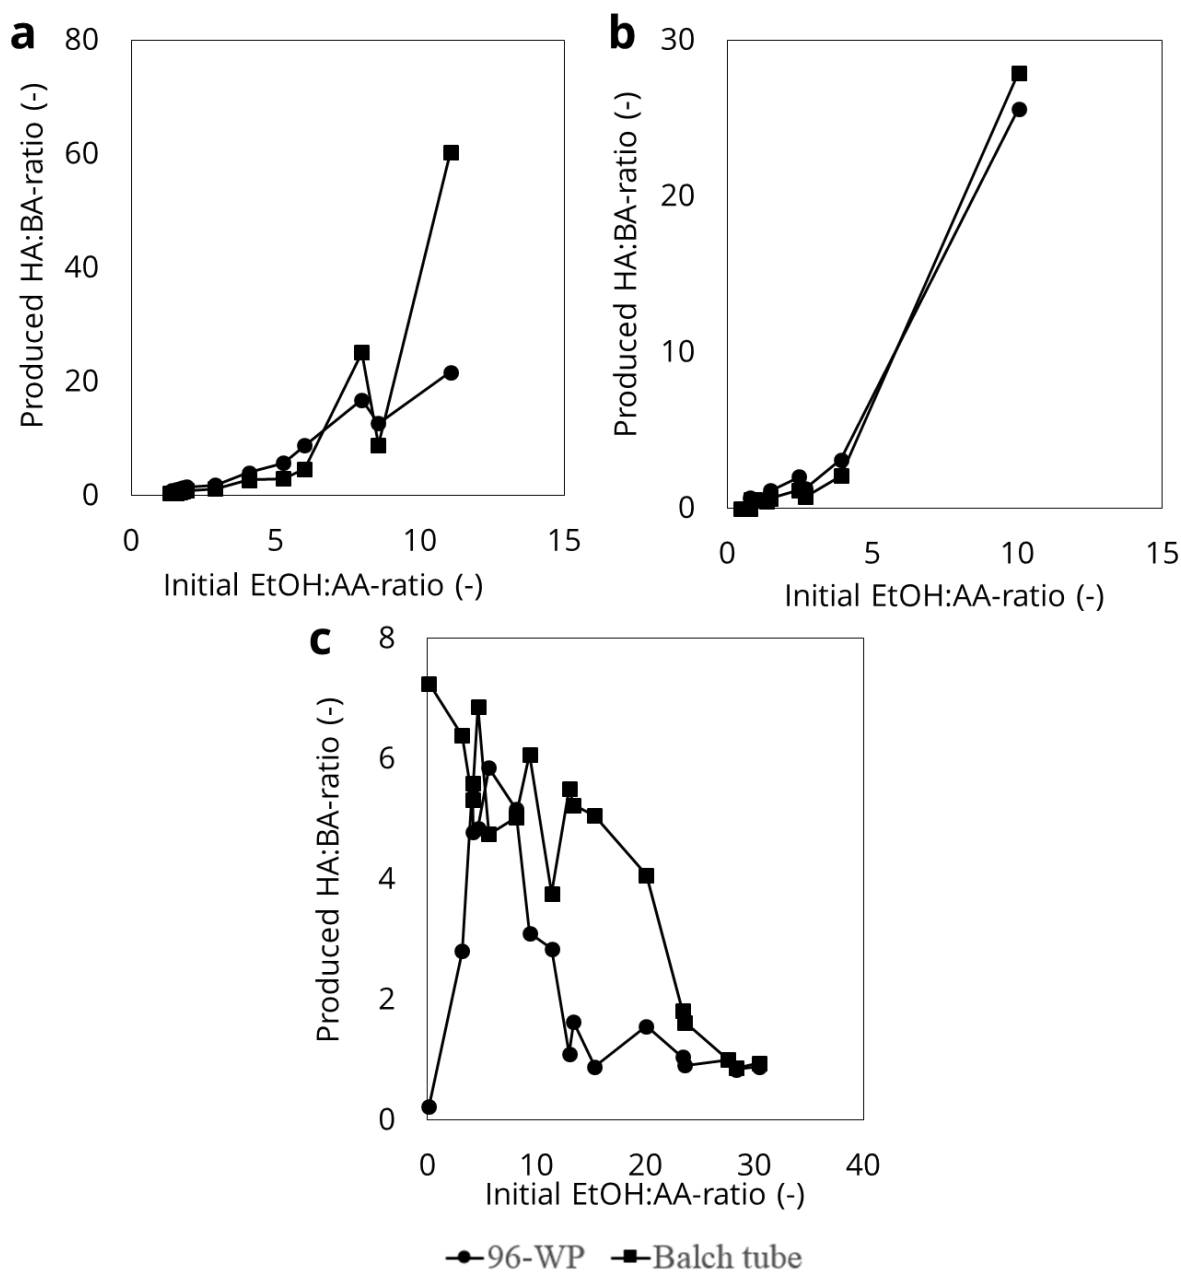

194

195 **Figure S.7. Influence of initial ethanol (EtOH) to acetic acid (AA) donor on**  
 196 **specificity of product output, expressed as the ratio of hexanoic acid (HA) produced to**  
 197 **butyric acid (BA) produced. Full circles (●) represent results in Balch tubes, full squares**  
 198 **(■) represent results in 96-WP. Only datapoints with net production of BA and HA in**  
 199 **both 96-WP and Balch tubes are shown.**

200 An increase in EtOH:AA-ratio increases the selectivity for HA-production, confirming  
 201 earlier literature reports<sup>6,7</sup>. For Experiments A and B (Figure 1A and 1B, respectively), an  
 202 increase in the EtOH:AA ratio – with fixed EtOH-concentration- results in an increase of the

203 HA:BA-ratio produced (Figure S.5A & S.5B). Similarly, fixing the AA-concentration, an  
204 increasing initial EtOH:AA-ratio again increases the HA:BA-ratio in the balch tubes at the end  
205 of Experiment C (Figure 1C). This is true up to the point where EtOH-toxicity becomes an  
206 issue, as indicated by the decreased production of BA and HA in balch tubes above an initial  
207 concentration of at most 700 mM EtOH (in this case an EtOH:AA-ratio of 10, Figure S.5C).  
208 This is confirmed by correlation coefficients for the HA:BA-ratio produced to the initial  
209 EtOH:AA ratio (Table S.IV).

210 **Table S.IV.** Pearson correlation coefficients between initial EtOH:AA-ratio and HA:BA-ratio  
211 produced over the experiment

|             | Experiment A | Experiment B |
|-------------|--------------|--------------|
| Balch tubes | 0.82         | 0.96         |
| 96-WP       | 0.98         | 0.94         |

212

213 **S.2.4. Correlating OD and biomass concentrations**

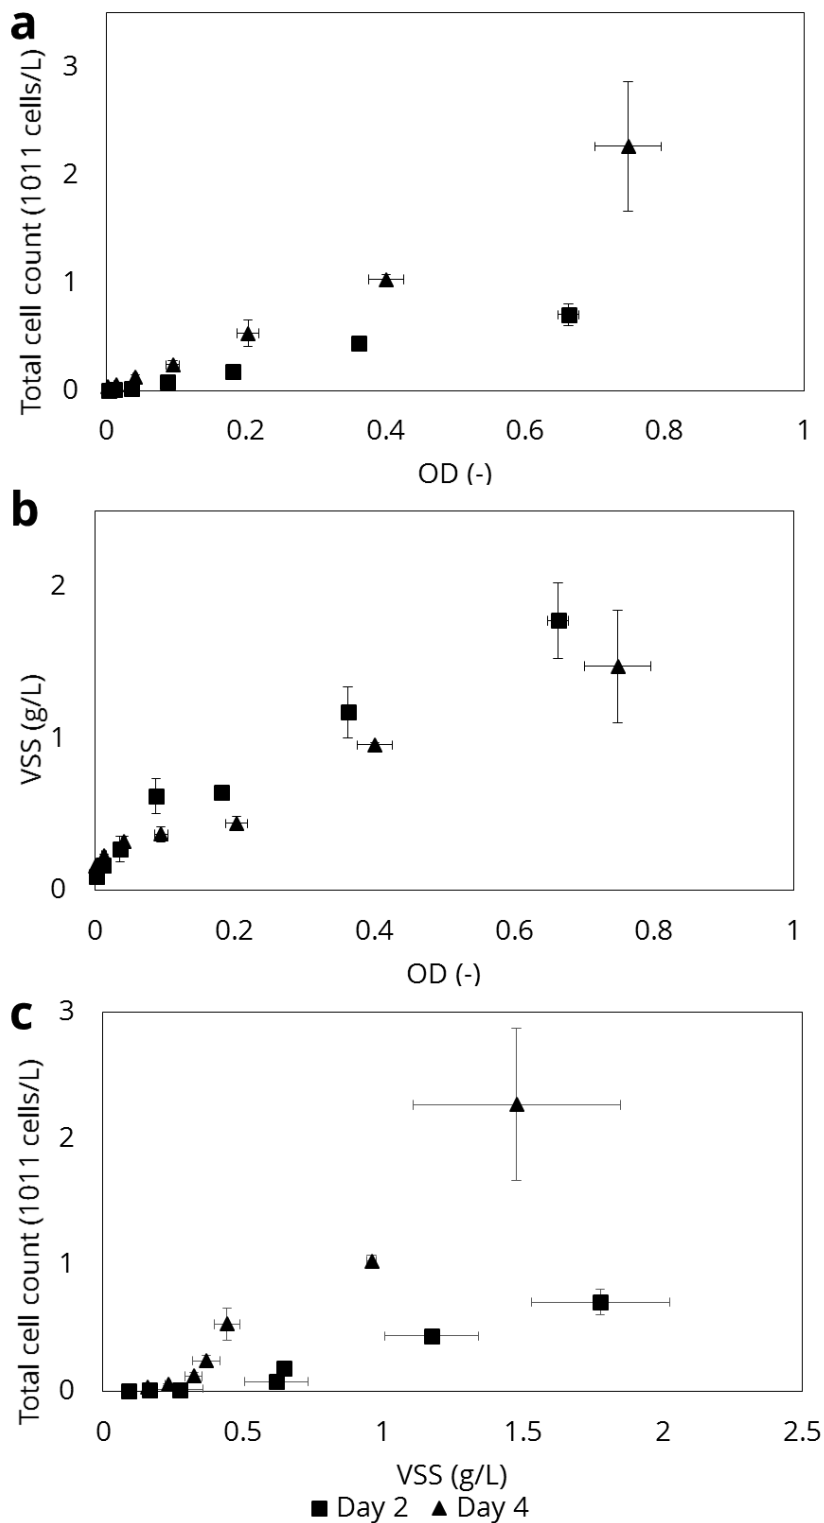

214

215 **Figure S.8. Total cell count (A) and VSS (B) as a function of OD and total cell count as a**  
 216 **function of VSS (C) after 2 (full squares, ■) and 4 (full triangles, ▲) days of growth in**  
 217 **batch mode. Error bars are standard deviations over triplicates, error bars can be**  
 218 **obscured by symbols.**

219 In a dilution series experiment, an OD was linked to VSS and total cell counts – by flow  
220 cytometry – as well as VSS and total cell counts to each other. For a given OD, biomass  
221 concentrations expressed as VSS will be lower after 4 days than at 2 days. However, the  
222 opposite is true when looking at total cell counts; the same OD at 4 days implies more cells  
223 present than it does at 2 days. This apparent contradiction implies the amount of cells per g VSS  
224 increases between day 2 and 4 – confirmed by Figure S.8C – which can be explained by the  
225 sporulation behaviour of *Clostridium kluyveri* after 3 days<sup>8</sup>. Because of these shifts in the  
226 relationships between OD, VSS and total cell counts over time, quantifying biomass based on  
227 OD is not possible for *Clostridium kluyveri* for extended periods – i.e. when sporulation can  
228 occur.



229 **S.2.5. Inconsistent growth curves in Experiment D**

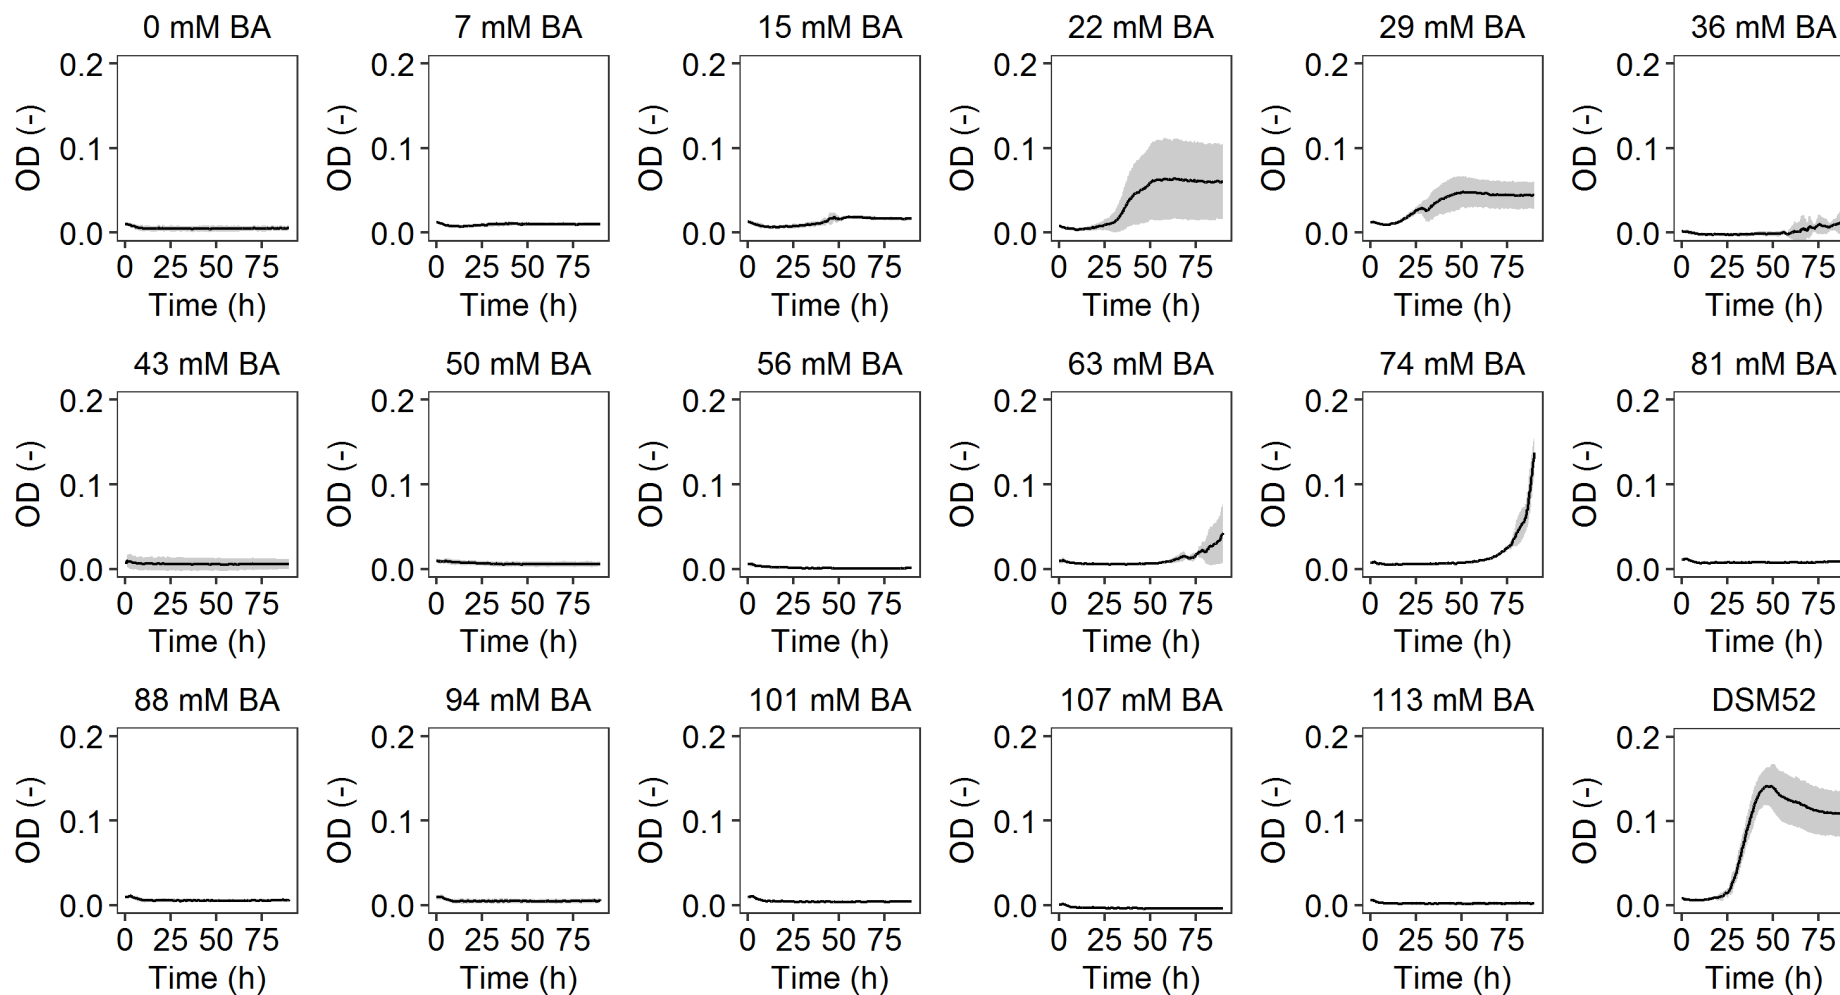

230

231 **Figure S.9. Growth curves for all wells in Experiment D (varying BA, without supplemented AA), titles represent initially supplied**  
232 **concentration of BA, lines and grey ribbons respectively represent average and standard deviations over triplicates.**

233 **S.2.6. Model selection**

234 The proposed models for each organic acid were calibrated using the data from the experiments  
235 for that acid, i.e. the proposed models for AA were calibrated using data from experiments A  
236 and B, BA using data from experiments E and F and HA using data from experiment G (Table  
237 1, main text),. The calibrations of these models are summarised in Table S.V. The best model  
238 for each compound was selected based on the lowest residuals value of all models as well as a  
239 visual control of the fit to the data.

240 **Table S.V. Overview of results for model selection for each organic acid involved in the metabolism. The parameter values reported in this**  
 241 **table are only valid within the datasets for each organic acid and do not represent the overall best fit.**

| Organic acid | Model Type                                   | $\mu_{\max}$ (h <sup>-1</sup> ) | K <sub>S</sub> (mM) | K <sub>I</sub> (mM)                | K (mM <sup>-1</sup> )           | Residuals value |
|--------------|----------------------------------------------|---------------------------------|---------------------|------------------------------------|---------------------------------|-----------------|
| AA           | Monod                                        | 0.17±0.01                       | -2.07±1.4           | -                                  | -                               | 566.6           |
|              | Haldane                                      | No fit achieved                 |                     |                                    |                                 |                 |
|              | <b>Monod coupled to toxicity limit term*</b> | <b>0.25±0.01</b>                | <b>4.69±2.8</b>     | <b>330 mM (arbitrarily chosen)</b> | -                               | <b>27.26</b>    |
| BA           | Linear inhibition                            | 0.35±0.05                       |                     |                                    | 5.4±1.1*10 <sup>-3</sup>        | 42.2            |
|              | <b>Toxicity limit</b>                        | <b>0.26±0.03</b>                |                     | <b>124.9±5.7</b>                   |                                 | <b>39.8</b>     |
| HA           | <b>Linear inhibition</b>                     | <b>0.19±0.03</b>                |                     |                                    | <b>10.1±1.5*10<sup>-3</sup></b> | <b>2.8</b>      |
|              | Toxicity limit                               | 0.14±0.02                       |                     | 61.6±1.4 mM                        |                                 | 11.0            |

242 **\*Bold text indicates best fit**

243 **Residuals are the sum of the difference between model prediction and experimental data for all data points**

244 **S.2.7. HA-toxicity**

245 To confirm increased salinity was not the mechanism of HA-toxicity, a control experiment was  
246 included in experiment G (main text, Table I) – varying initial concentrations of HA and  
247 monitoring growth. NaCl was supplemented to the standard DSM52-medium to obtain the same  
248 electrical conductivity as the experiment with the highest HA-concentration. The average of the  
249 replicates, and standard deviations over replicates, of this NaCl-control are shown next to some  
250 selected growth curves at different HA-concentrations (including lowest and highest  
251 concentration) in Figure S.8. Even though the lag time is longer for the NaCl-control  
252 ( $24.7\pm 2.4$ h) than for 5 mM HA ( $11.7\pm 0.3$ h), and the maximum OD is lower ( $0.228\pm 0.038$  for  
253 NaCl vs.  $0.407\pm 0.005$  for 5mM HA), there is still growth at an electrical conductivity equivalent  
254 to 184 mM HA, while growth is fully inhibited at HA concentrations above 95 mM.

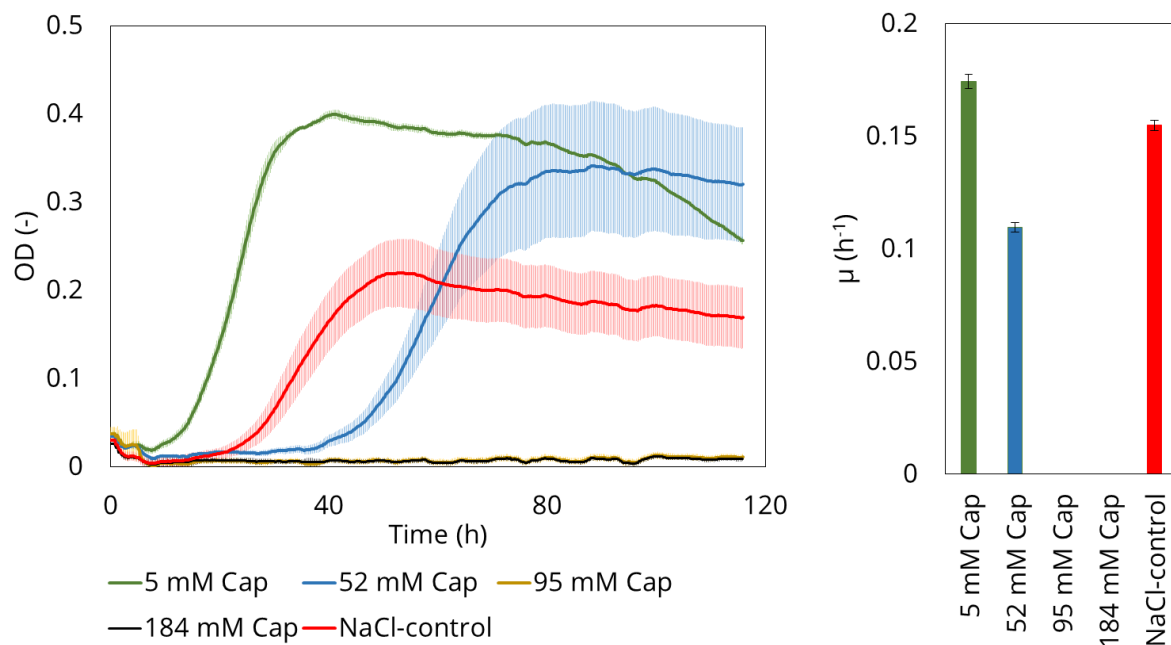

255

256 **Figure S.10. Comparison of growth at different concentrations of HA with the NaCl-**  
257 **control put at the same electrical conductivity as the highest HA-concentration. All data**  
258 **obtained in experiment G. Error bars indicate standard deviation over all replicates for**  
259 **that condition (n=3).**

260 **S.2.8. Parameter estimation**

261 Fit appropriateness of the kinetic model was evaluated by a combination of 95% confidence  
262 intervals (Table 3) – estimated by linear approximation of the covariance matrix with the  
263 inverse of the Fisher Information Matrix -, correlations between parameters (Table S.VI) and  
264 normality of the model output deviation (Figure S.11).

265 The correlation matrix is shown in Table S.VI. A moderate positive correlation is found  
266 between the affinity constant for AA ( $K_{S,AA}$ ) and  $\mu_{max}$ , whereas all other correlations are low.  
267 Hence, this should not lead to problems during parameter estimation.

268 **Table S.VI. Correlation matrix for parameter estimation of kinetic model. Values given**  
269 **are Pearson coefficient for correlation between all parameters**

|             | $\mu_{max}$ | $K_{S,AA}$ | $K_{I,BA}$ | $K_{HA}$ |
|-------------|-------------|------------|------------|----------|
| $\mu_{max}$ | 1           | 0.579      | 0.057      | 0.162    |
| $K_{S,AA}$  | 0.579       | 1          | 0.156      | 0.056    |
| $K_{I,BA}$  | 0.057       | 0.156      | 1          | 0.002    |
| $K_{HA}$    | 0.162       | 0.056      | 0.002      | 1        |

270

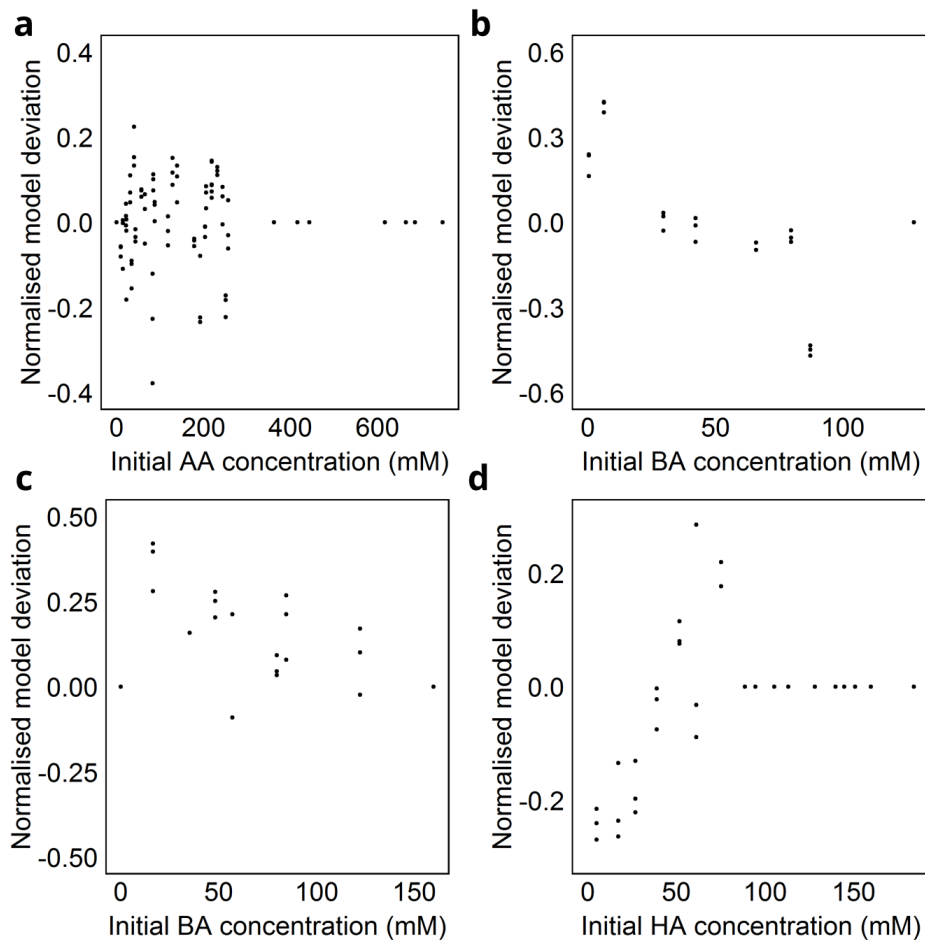

271

272 **Figure S.11. Normalised deviation of model output for all organic acids involved in the**  
 273 **metabolism of *C. kluyveri*. S.9A. shows the data for varying AA-concentration at a fixed**  
 274 **EtOH concentration (343 mM) (experiments A and B; Table 1). S.9B shows model output**  
 275 **deviation as a function of varying concentrations of HA with an initial AA-concentration**  
 276 **of 6 mM (Experiment E; Table 1), while S.9C shows the same, but with 1.6 mM AA**  
 277 **initially present. Lastly, S.9D shows normalized model output deviation with varying HA-**  
 278 **concentrations in standard DSM52 medium (in practice: 80 mM AA, 343 mM EtOH).**

279 **S.2.9. Dynamic mass-balance model**

280 A second model validation was performed by expanding the model to a chemostat reactor (see  
281 section S.3.1.). Simulations of this chemostat model were run under the same conditions as  
282 reported in literature<sup>3</sup> (Figure S.12). This confrontation hints at another shortcoming of the  
283 model: despite an apparent  $\mu_{\max}$  of  $0.240 \pm 0.011 \text{ h}^{-1}$  observed in batch growth experiments in  
284 this study, chemostat studies demonstrated that a culture of *Clostridium kluyveri* is not yet  
285 washed out at a D of  $0.287 \pm 0.008 \text{ h}^{-1}$ <sup>3</sup>. Continuous simulations of this dynamic stoichiometric  
286 mass balance model showed culture wash-out at a D as low as  $0.187 \text{ h}^{-1}$  at standard conditions  
287 (343 mM EtOH, 100 mM AA).

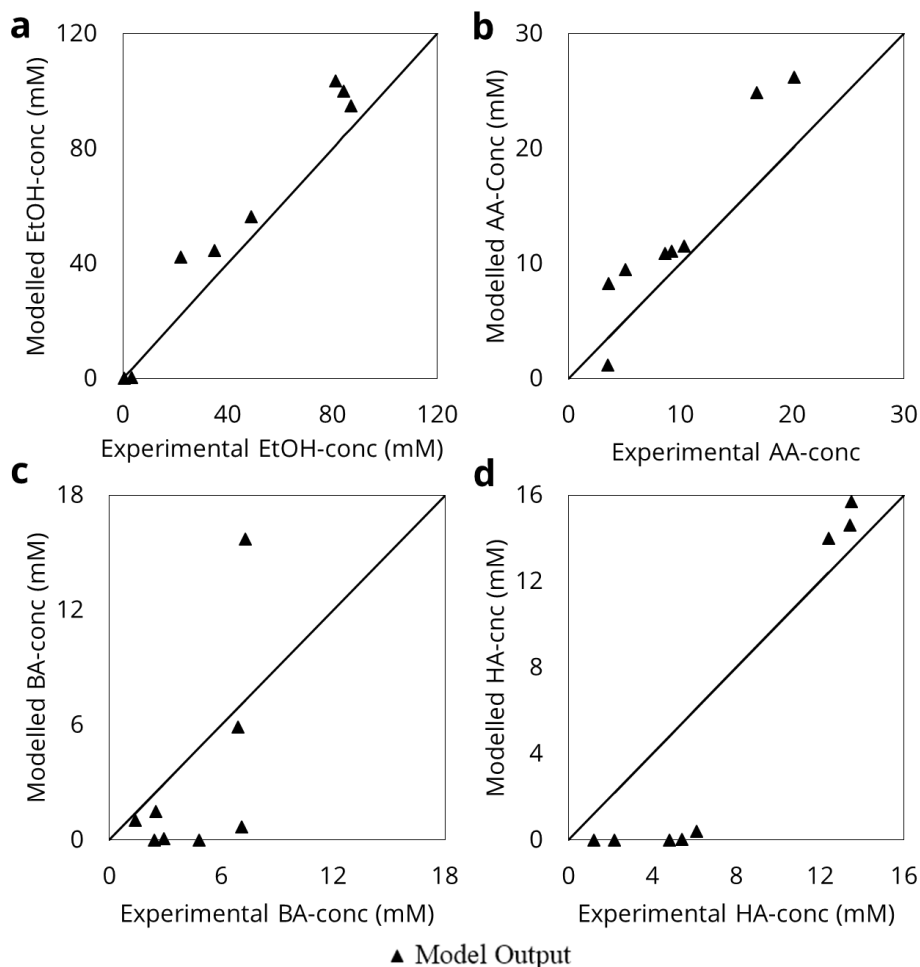

288

289 **Figure S.10. Comparison of continuous dynamic ODE-model to literature data<sup>3</sup>. Bisector**  
290 **represents outcome of a model perfectly simulating chemostat conditions. Full triangles**  
291 **(▲) show output of chemostat model using experimentally determined parameters in this**  
292 **study. Subfigures a-d show different simulated conditions, cf. Table S.II.**

293 **S.2.10. Production kinetics of *Clostridium kluyveri* in 96-WP**

294 To validate the dynamic model for growth of and production by *Clostridium kluyveri* data was  
295 collected of a batch growth experiment in 96-WP in the anaerobic closet.

296 A data quality control was performed by looking at replicability within a plate, as well as  
297 replicability between plates. The first shows whether there is any influence due to the  
298 disturbances during sampling (i.e. measuring OD, removing lid, sampling, refilling emptied  
299 wells and putting back the lid), while the latter shows how replicable the experiment as a whole  
300 is.

301 The replicability within a plate is excellent; average OD of the sampled wells and those  
302 wells sampled at the last timepoint were within 1 standard deviation from each other, with only  
303 one exception (Figure S.12E at 40h). This implies that the sampling procedure does not disturb  
304 the growth of *Clostridium kluyveri*.

305 Replicability between plates, however, is rather low, as demonstrated by Figure S.13.  
306 Figure S.13A shows the case for the High AA-condition, where mainly  $\lambda$  is very variable  
307 between experiments. For the Low AA-condition (Figure S.13B) not only  $\lambda$  varies between  
308 experiments (especially Plate 1), but also the final OD changes between supposed replicate  
309 experiments (Plate 2 at approx. half the OD of Plate 1 and 3). Because of this, the experiment  
310 as a whole was not considered for model validation, but for each condition, the – subjectively  
311 – best experiment was selected, based on the number of sampling points during the exponential  
312 phase; Plate 2 for High AA, Plate 3 for Low AA.

313 Profiles of product formation and substrate production for both conditions and all plates  
314 (Figure S.14) show some patterns across experiments: (1) the accumulation of HA is not  
315 necessarily preceded by accumulation of BA in the environment, seemingly contradicting  
316 literature data<sup>9</sup>, however, the resolution of the data reported here is lower due to the limitation  
317 of the number of timepoints; (2) BA appears to have a peak concentration during the



318 exponential phase, after which concentrations of BA decrease again – in accordance with what  
 319 is reported in literature<sup>9</sup> and; (3) Production of HA does not stop when growth stops, due to  
 320 maintenance metabolism in the stationary phase. What causes the switch from exponential  
 321 growth to stationary phase is not clear, but growth stops before toxic concentrations of HA are  
 322 reached in the case of High AA. In the case of Low AA, toxic concentrations are never reached,  
 323 yet growth stops before reaching the highest HA-concentrations and substrate is never  
 324 completely depleted.

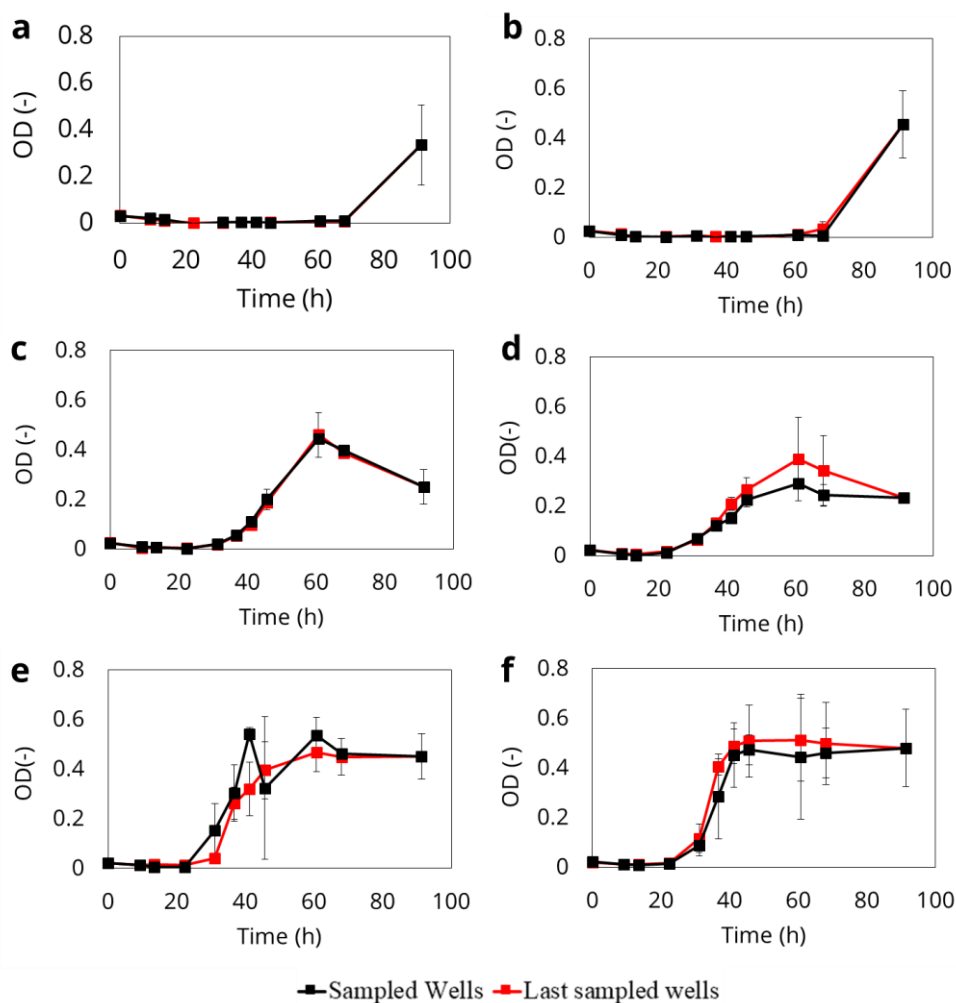

325

326 **Figure S.12. Comparison within a plate of replicability of growth. Black squares (■)**  
 327 **display OD of the wells sampled at each timepoint, red squares (■) represent OD of the**  
 328 **wells sampled at the last timepoint (91.3 h) over the course of the experiment. Error bars**  
 329 **indicate standard deviation over 3 wells (n=3). Figures A and B High AA and Low AA**  
 330 **conditions respectively for Plate 1, C and D show High AA and Low AA conditions**  
 331 **respectively for Plate 2, E and F show High AA and Low AA conditions respectively for**  
 332 **Plate 3.**

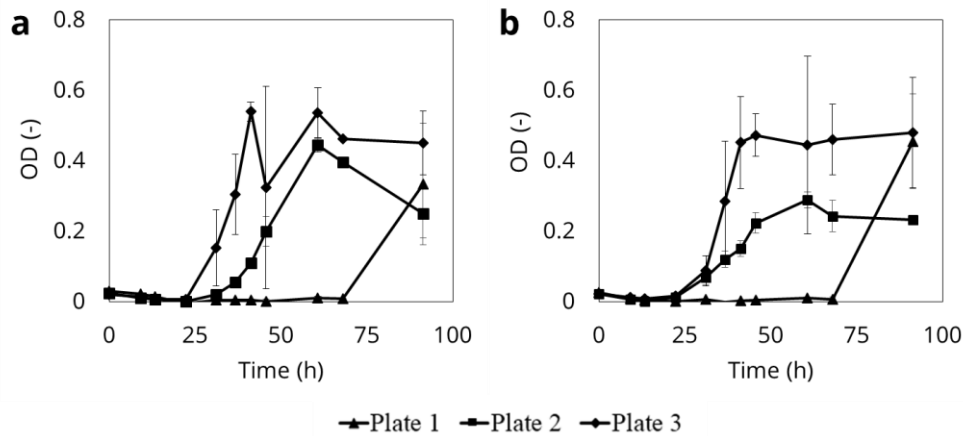

333

334 **Figure S.13. Comparison of growth between plates. OD of the sampled wells at each**  
 335 **timepoint for Plate 1, Plate 2 and Plate 3 are represented by full black triangles (▲),**  
 336 **squares (■) and diamonds (◆) respectively. Error bars indicate standard deviation over**  
 337 **3 wells (n=3). A shows results for High AA in each plate, B shows the same for Low AA.**

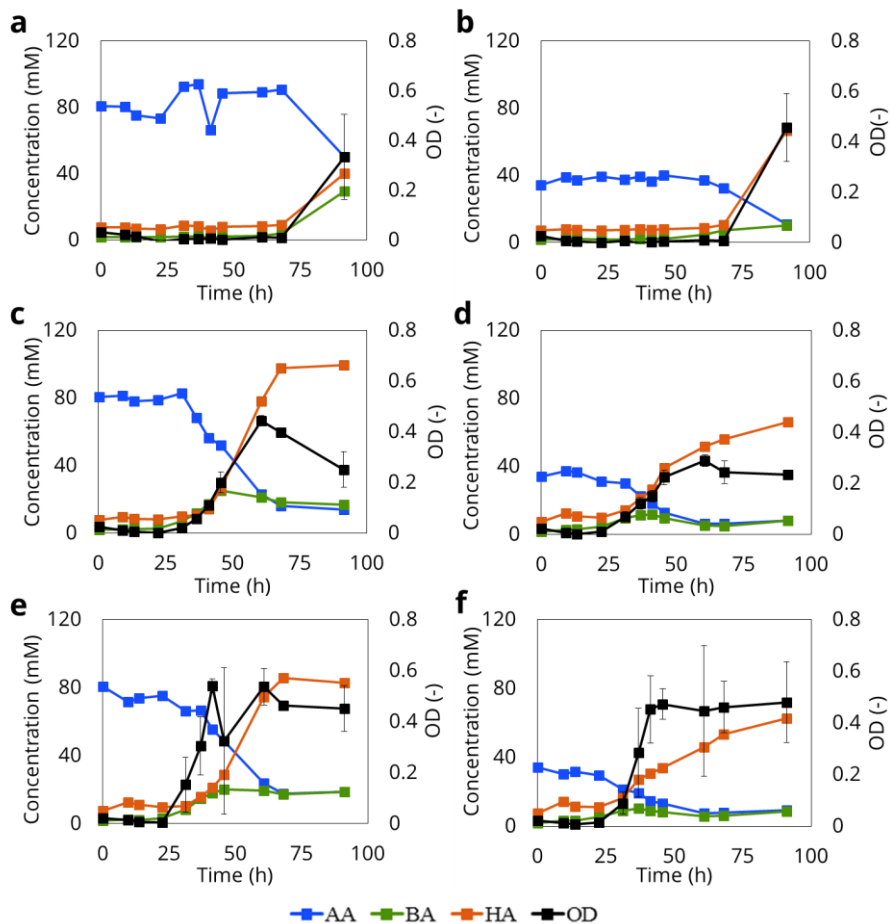

338

339 **Figure S.14. Kinetics of substrate consumption and product formation by *Clostridium***  
 340 ***kluyveri* over the course of the experiment for each plate (a, c and e show High AA for**  
 341 **Plate 1, 2 and 3 respectively, b, d and f show Low AA for Plate 1, 2 and 3). Blue(■),**  
 342 **brown(■) and green(■) squares show concentrations of AA, BA and HA respectively after**  
 343 **pooling of the wells (n=1) on the left vertical axis. Black squares (■) show average OD of**  
 344 **wells at time of sampling, error bars represent standard deviation over replicates (n=3).**

345 **S.2.11. Assessment of buffering capacity**

346 The medium used in these experiments contained less buffer capacity than the conventional  
347 DSM52 medium. In Balch tubes, no CO<sub>2</sub> was present in the headspace for buffering, while the  
348 anaerobic closet contained 10% CO<sub>2</sub> instead of the recommended 20% CO<sub>2</sub>. It was already  
349 shown in the manuscript that final product concentrations in Balch tubes and 96-WP were very  
350 similar, giving a first indication *C. kluyveri* was not majorly affected by this change. Secondly,  
351 the final pH (Table S.VII), shows a similar trend. pH at the end of the experiment is slightly  
352 higher in the anaerobic closet, but always within the pH range for optimum growth of *C.*  
353 *kluyveri*<sup>8</sup>. Additionally, because the growth curve is log transformed before fitting the growth  
354 curve, the early exponential phase will carry greater weight in determination of  $\mu$ . In this phase  
355 of growth, conditions are still close to initial conditions, and the buffering capacity is of lower  
356 importance.

357

358 **Table S.VII. Initial pH and final pH for incubations in Balch tubes and 96-WP in**  
 359 **experiment G, varying the initial HA concentration between 0 and 184m mM HA. Above**  
 360 **a concentration of 90 mM HA no more growth occurred, and differences in pH are solely**  
 361 **physicochemical in nature**

| Initial HA (mM)      | Initial pH | Final pH<br>Balch tubes | Final pH<br>96-WP |
|----------------------|------------|-------------------------|-------------------|
| 5                    | 7.79       | 6.45                    | 7.04              |
| 17                   | 7.87       | 6.54                    | 6.98              |
| 27                   | 7.9        | 6.72                    | 6.95              |
| 39                   | 7.81       | 6.62                    | 6.94              |
| 52                   | 7.91       | 7.04                    | 7.24              |
| 61                   | 7.89       | 7.99                    | 7.88              |
| 75                   | 7.85       | 7.8                     | 7.96              |
| 89                   | 7.42       | 7.9                     | 8.09              |
| 95                   | 7.8        | 8.05                    | 8.07              |
| 105                  | 7.51       | 7.89                    | 8.25              |
| 113                  | 7.82       | 7.93                    | 8.22              |
| 128                  | 7.81       | 7.99                    | 8.19              |
| 140                  | 7.83       | 8.15                    | 8.19              |
| 145                  | 7.83       | 8.12                    | 8.21              |
| 151                  | 7.85       | 8.03                    | 8.21              |
| 160                  | 7.88       | 8.29                    | 8.23              |
| 184                  | 7.77       | 8.18                    | 8.18              |
| Abiotic control      | 7.61       | 7.92                    | 8.43              |
| No substrate control | 8.24       | 8.29                    | 8.25              |
| Salinity control     | 7.76       | 6.32                    | 7.28              |

362

### 363 **S.3. Discussion**

#### 364 **S.3.1. Thermodynamical impact of H<sub>2</sub> accumulation**

365 H<sub>2</sub> is a product of chain elongation by *C. kluyveri*, so increasing H<sub>2</sub> partial pressures in the gas  
 366 headspace decreases the energy gain ( $\Delta G^0$ ) from the chain elongation metabolism. To assess  
 367 whether H<sub>2</sub> accumulation in Balch tubes could hinder the energy generation in this metabolism,  
 368 theoretical calculations were performed, tracking  $\Delta G^1$  during reaction, with vs. without H<sub>2</sub>  
 369 accumulation. This was done for the hypothetical situation where only the first step of the chain  
 370 elongation process proceeds (i.e. EtOH and AA to BA), as well as the situation where both steps  
 371 of the metabolism occur in series, and only HA is being produced and no BA (see S.1.7.). This  
 372 was compared to the experimentally observed endpoint of the reaction.

373 For both cases, a clear impact on  $\Delta G^1$  of the accumulation of  $H_2$  can be observed, causing the  
374 case with accumulation of  $H_2$  in the headspace to cross the maximum feasible  $\Delta G^1$ , and thus  
375 become thermodynamically unfeasible (Figure S.13.). Some of the assumptions made for the  
376 calculations (see S.1.7.) may however be imperfect: (i) Formation of longer chain alcohols has  
377 been observed by *C. kluyveri*<sup>10</sup>, implying at least some  $H_2$  lost in the reduction of carboxylic  
378 acids to alcohols. (ii) Based on the determined  $Y_{EtOH}$ ,  $6\pm 1.7\%$  of the EtOH consumed ends up  
379 in the form of biomass, again implying a reduction of  $H_2$  production. (iii) Metabolic studies  
380 have shown that *C. kluyveri* uses a slightly alternative pathway under low substrate,  
381 thermodynamically limiting conditions. This alternative pathway generates less ATP per  
382 reaction step (i.e. lower kinetics), but can take place at higher  $\Delta G^1$ , and could be used as a  
383 means to continue growing under high  $H_2$  partial pressures<sup>5</sup>. If the  $\Delta G^1$ -limit is a switch between  
384 metabolisms, rather than an endpoint, then  $H_2$  partial pressure is approx. 1.2 atm and approx.  
385 73 mM of HA would be produced at the time of the switch, which is already close to the  
386 stationary phase of the growth curve (Figure S.12.). Because these conditions fall outside the  
387 scope of the study, they were not included in the kinetic model. If the assumption of  
388 thermodynamics forcing a switch between high and low energy yielding metabolism shows  
389 true, another set of kinetics could be determined at high  $H_2$  partial pressures, and included in  
390 the kinetic model.

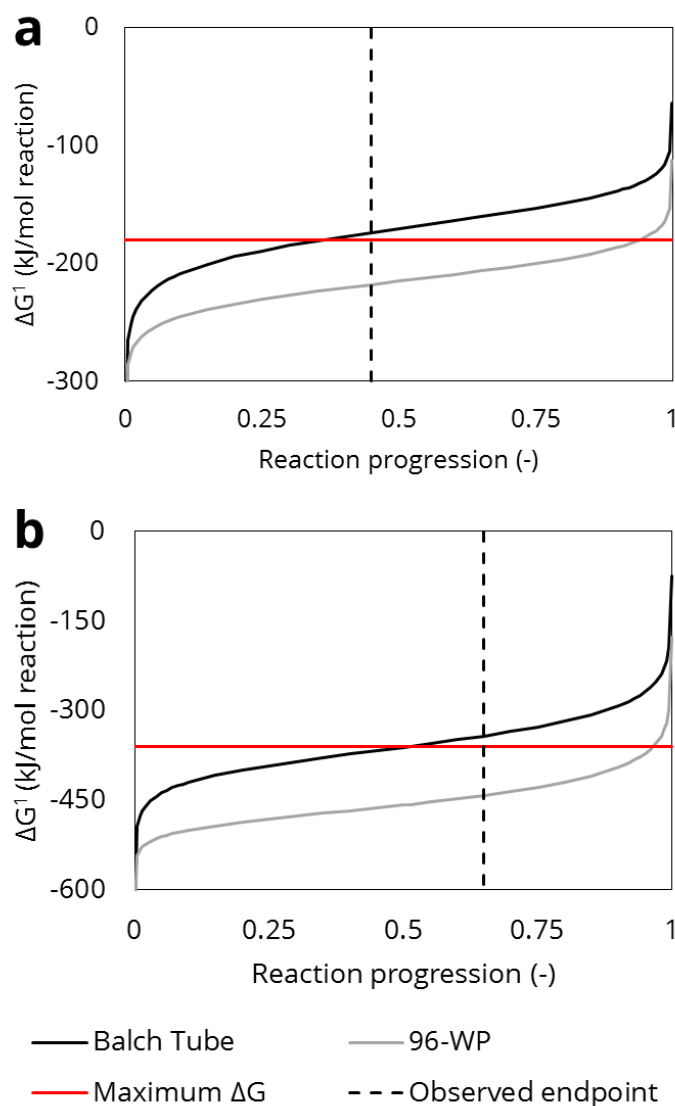

391

392 **Figure S.15. Gibbs free energy ( $\Delta G^1$ ) as a function of reaction progression.  $\Delta G^0_r$  was**  
 393 **calculated from reference values<sup>4</sup> and was corrected for temperature (37°C or 310.15 K),**  
 394 **and pH (pH = 7). Starting in DSM 52 medium as initial conditions, A shows the evolution**  
 395 **of  $\Delta G^1$  if only the first step of the chain elongation reaction takes place as a function of**  
 396 **reaction progression (i.e. fraction of AA consumed). B shows the same if both reaction**  
 397 **steps occur - only HA is a carboxylate product – as a function of reaction progression (i.e.**  
 398 **fraction of EtOH consumed). Black line shows the case with accumulation of H<sub>2</sub> in a Balch**  
 399 **Tube, while the grey line shows evolution of  $\Delta G^1$  in case no H<sub>2</sub> is accumulated, cf. 96-WP.**  
 400 **Red line indicates the maximum  $\Delta G^1$  value generated in the chain elongation steps to**  
 401 **generate sufficient ATP at 72 kJ.mol ATP<sup>-1</sup> <sup>5</sup>. The dashed black line indicates where**  
 402 **reaction has been observed to stop, based on H<sub>2</sub> partial pressure (Fig A) or HA-**  
 403 **concentration (Fig B).**

404 **S.3. Bibliography**

- 405 1. R Core Team. R: A language and environment for statistical computing. (2015).
- 406 2. Van Nevel, S., Koetzsch, S., Weilenmann, H. U., Boon, N. & Hammes, F. Routine  
407 bacterial analysis with automated flow cytometry. *J. Microbiol. Methods* **94**, 73–76  
408 (2013).
- 409 3. Kenealy, W. R. & Waselefsky, D. M. Studies on the substrate range of *Clostridium*  
410 *kluuyveri*; the use of propanol and succinate. *Arch. Microbiol.* **141**, 187–194 (1985).
- 411 4. Kleerebezem, R. & Van Loosdrecht, M. C. M. A generalized method for thermodynamic  
412 state analysis of environmental systems. *Crit. Rev. Environ. Sci. Technol.* **40**, 1–54  
413 (2010).
- 414 5. Angenent, L. T. *et al.* Chain Elongation with Reactor Microbiomes : Open-Culture  
415 Biotechnology To Produce Biochemicals. *Environ. Sci. Technol.* **50**, 2796–2810 (2016).
- 416 6. Barker, H. A. & Taha, M. *Clostridium Kluuyverii*, an organism concerned in the formation  
417 of caproic acid from ethyl alcohol. *J. Bacteriol.* **43**, 347–363 (1941).
- 418 7. Smith, G. M., Kim, B. W., Franke, A. A. & Roberts, J. D. <sup>13</sup>C NMR Studies of Butyric  
419 Fermentation in *Clostridium kluuyveri*. *J. Biol. Chem.* **260**, 13509–13512 (1985).
- 420 8. Gildemyn, S. *et al.* Upgrading syngas fermentation effluent using *Clostridium kluuyveri*  
421 in a continuous fermentation. *Biotechnol. Biofuels* **10**, 83 (2017).
- 422 9. Thauer, R. K., Jungermann, K., Henninger, H., Wenning, J. & Decker, K. The Energy  
423 Metabolism of *Clostridium kluuyveri*. *Eur. J. Biochem.* **4**, 173–180 (1968).
- 424 10. Seedorf, H. *et al.* The genome of *Clostridium kluuyveri* , a strict anaerobe. *Proc. Natl.*  
425 *Acad. Sci. U. S. A.* **105**, 2128–2133 (2008).

426
